# Supplementary material for: A Participatory and Spatial Multicriteria Decision Approach to Prioritize the Allocation of Ecosystem Services to Management Units
Source: MDPI journal article supplement (doi:10.3390/land10070747), 2021-07-16
Supplement: s1 [file s1]

Supplement S4

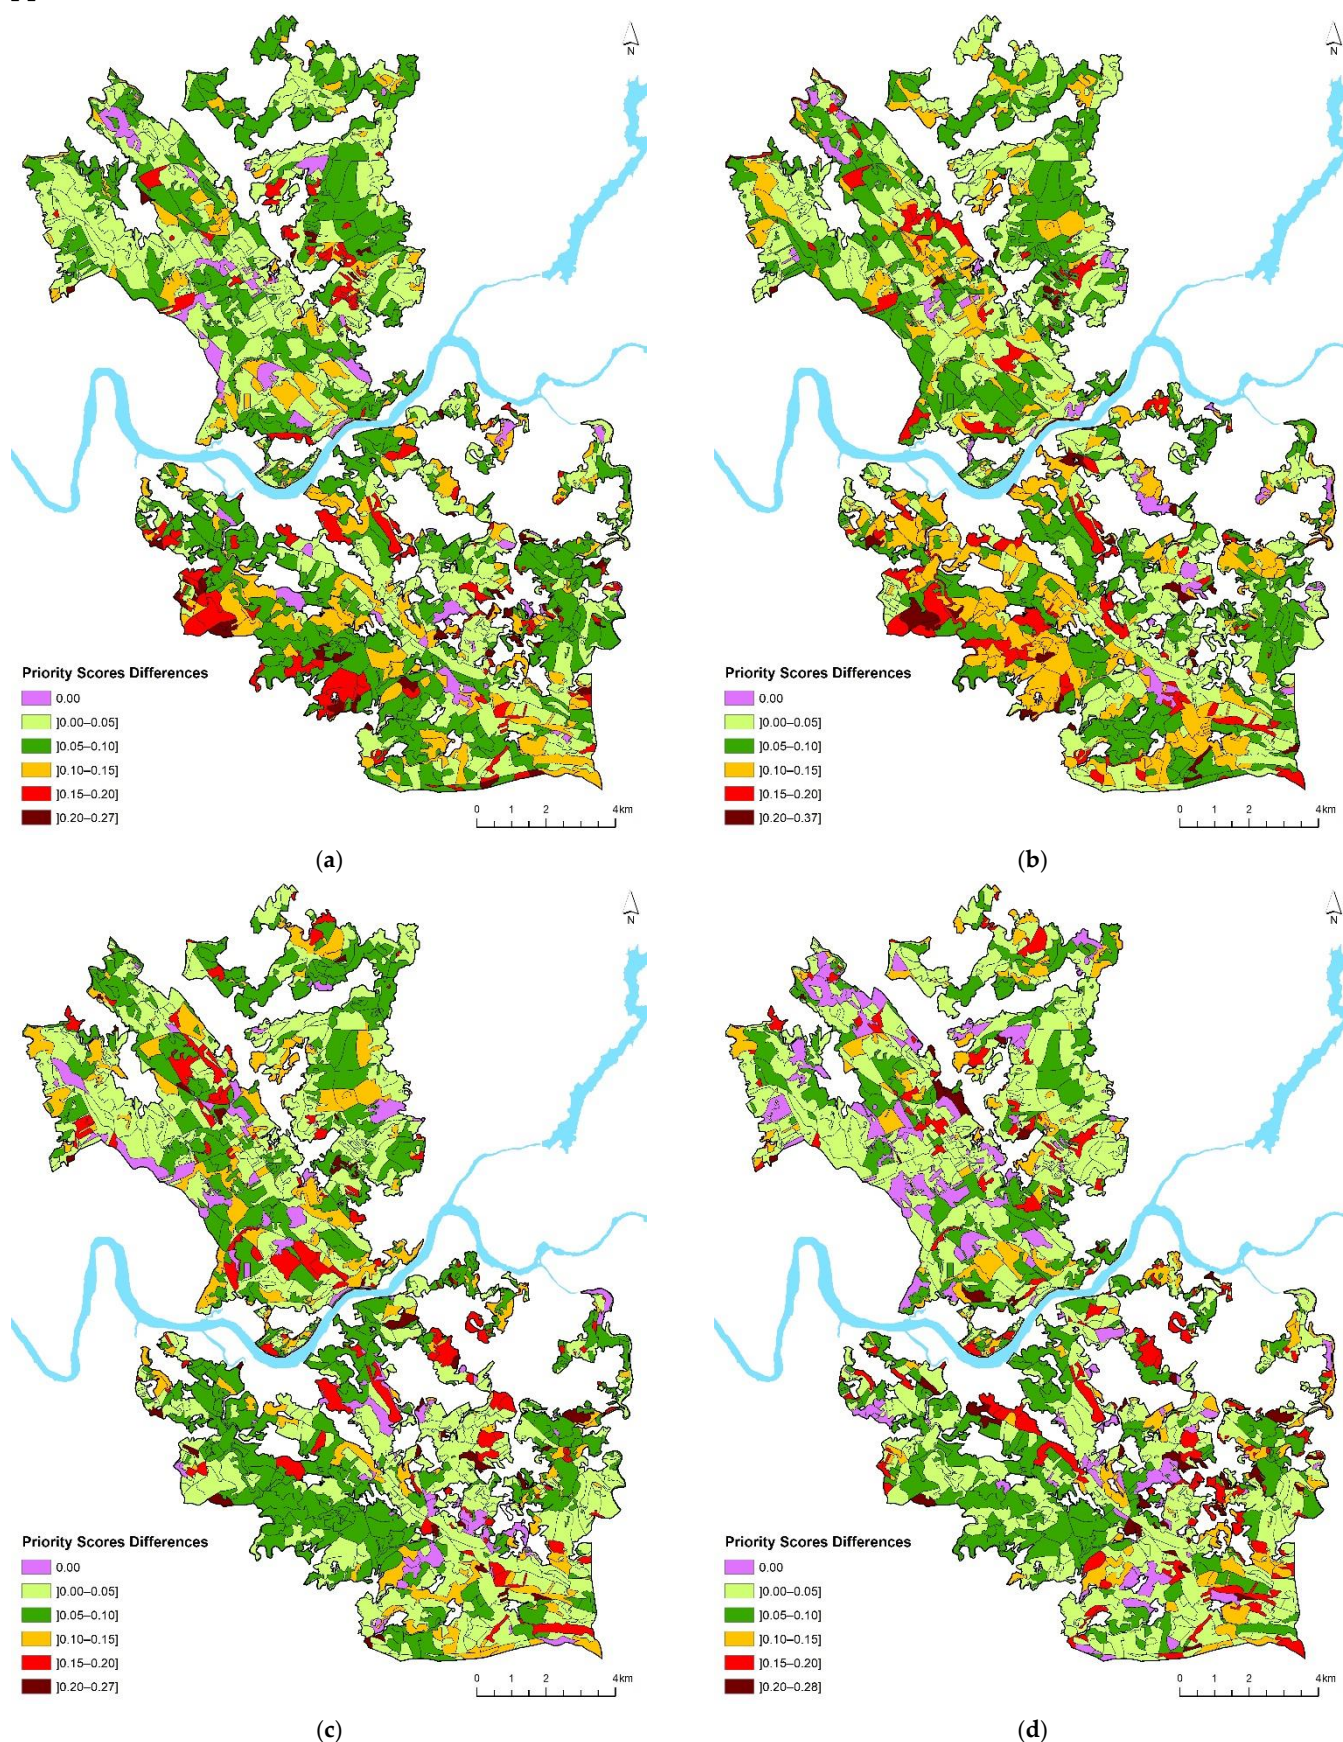

**Figure S4.** Differences of priority scores between pairs of interest groups: (a) civil society and forest owners; (b) civil society and public administration; (c) forest owners and market agents; (d) market agents and public administration.
