# Supplementary material for: A Participatory and Spatial Multicriteria Decision Approach to Prioritize the Allocation of Ecosystem Services to Management Units
Source: MDPI journal article supplement (doi:10.3390/land10070747), 2021-07-16
Supplement: s1 [file s1]

Supplement S5

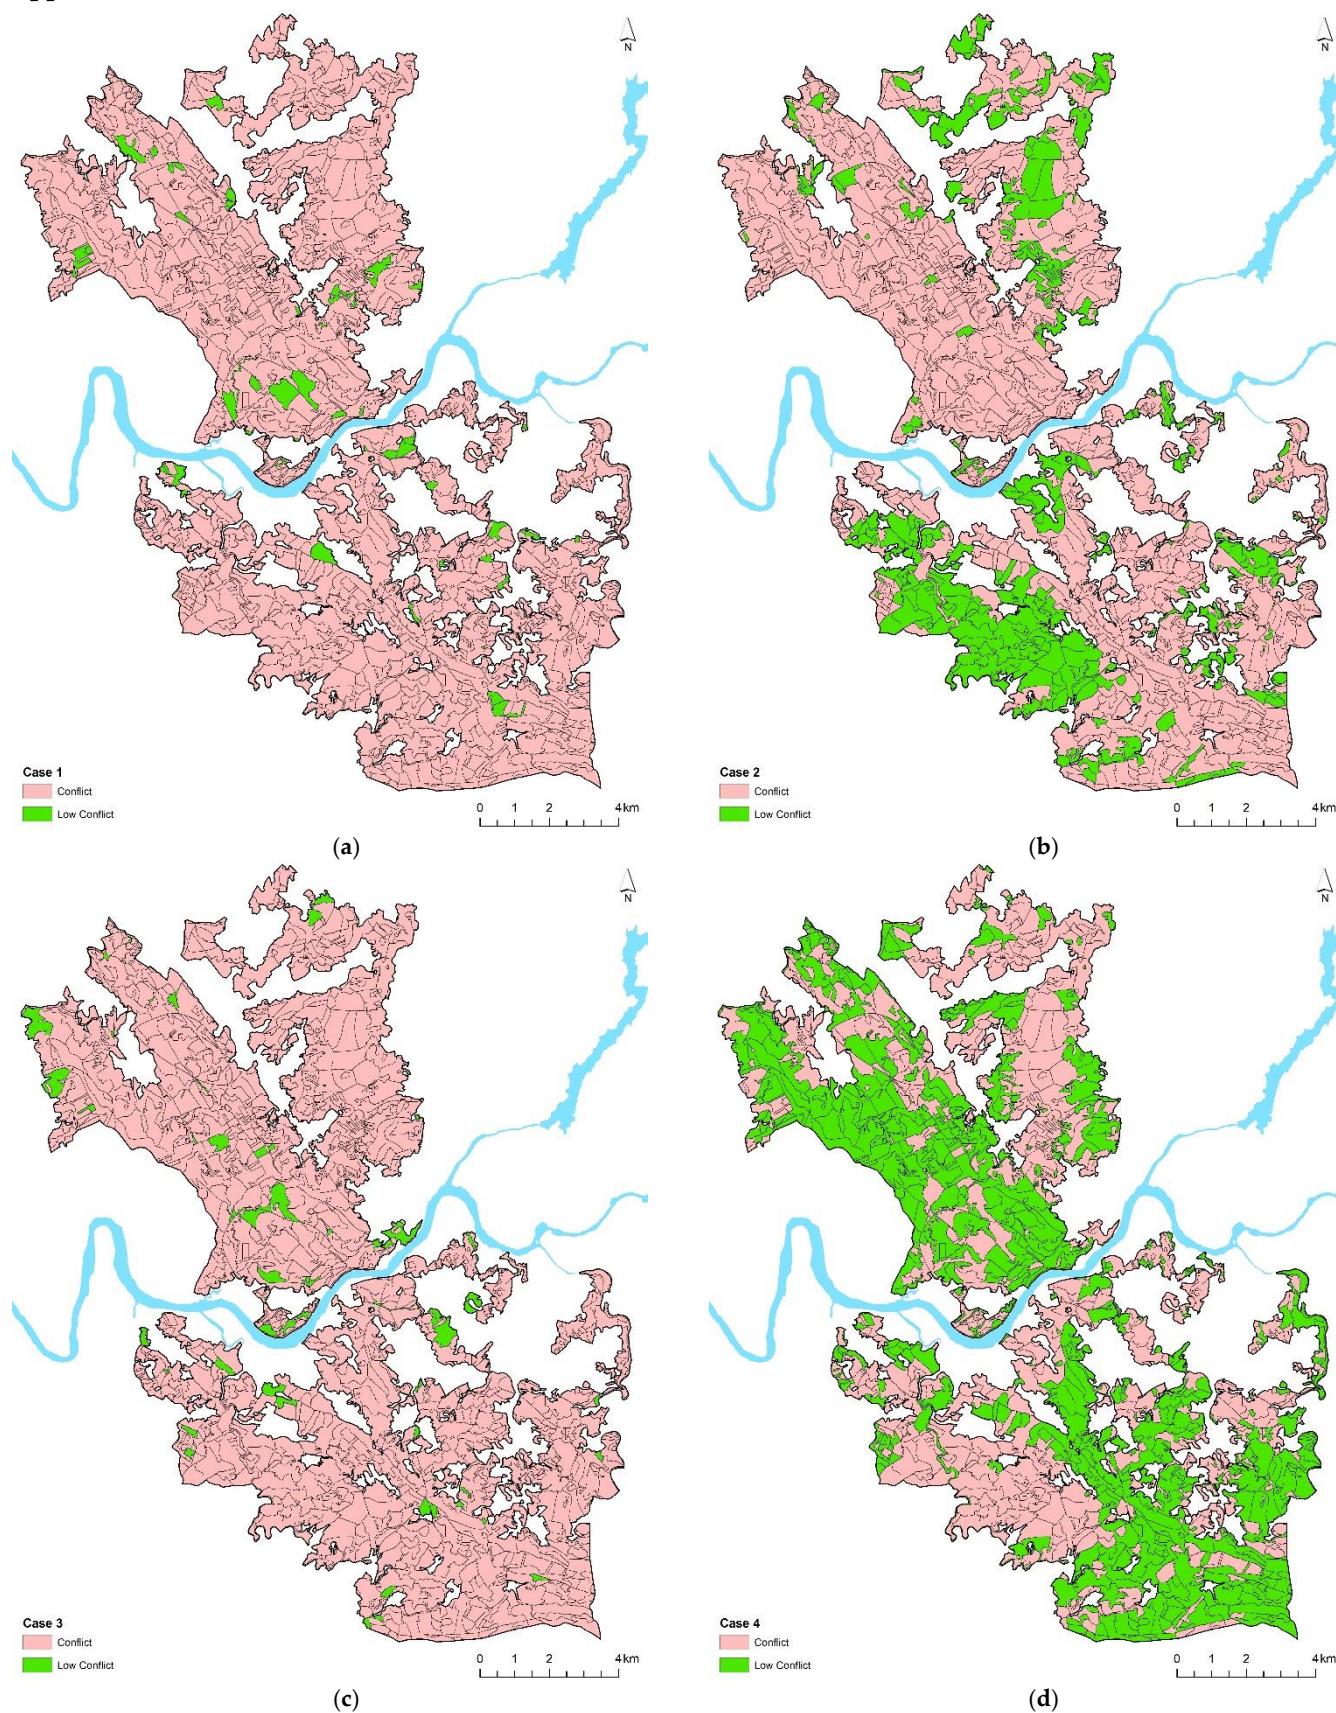

**Figure S5.** The four cases of NetWeaver logic model: (a) case 1, the priorities of forest owners and public administrators are basically compatible; (b) case 2, high priority in only civil society and any other group's high priority is a potential conflict; (c) case 3, high

priority in only market agents and any other group's high priority is a potential conflict; (d) case 4, no group rates the priority high or very high in a management unit.
