# Supplementary material for: A Participatory and Spatial Multicriteria Decision Approach to Prioritize the Allocation of Ecosystem Services to Management Units
Source: MDPI journal article supplement (doi:10.3390/land10070747), 2021-07-16
Supplement: s1 [file s1]

# Supplement S1

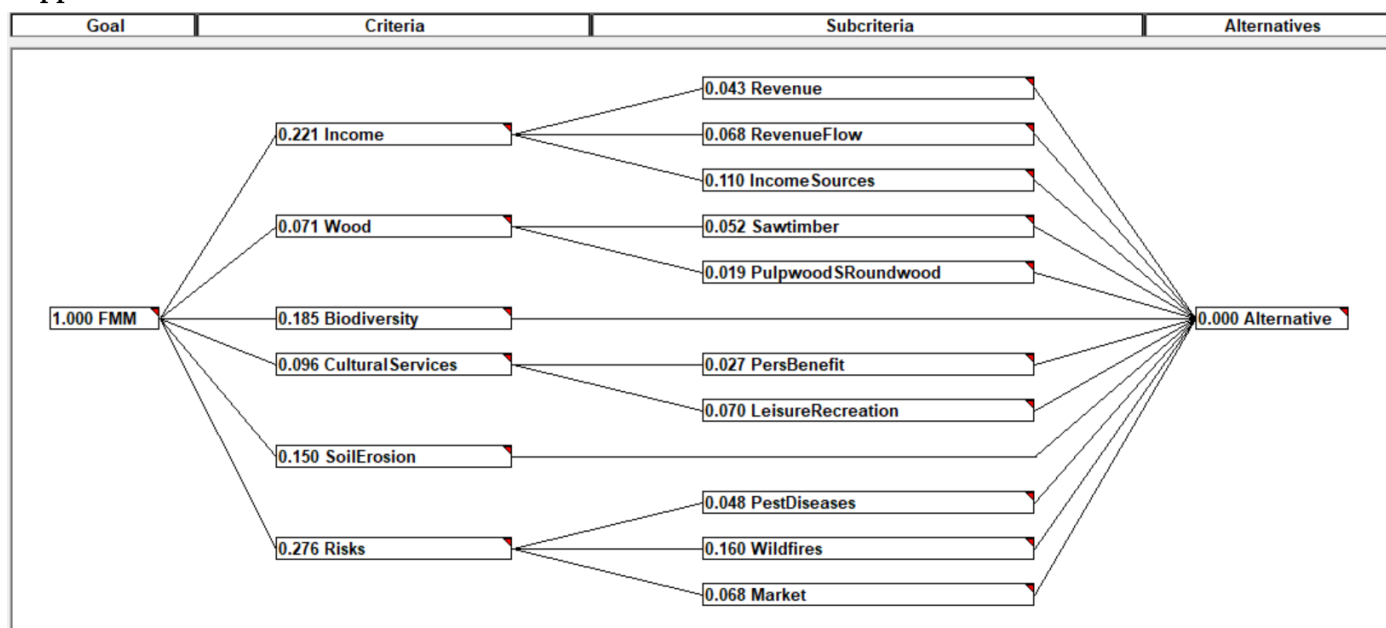

**Figure S1.** Criteria and sub-criteria weights of the MCDA model. Example from civil society group [25]. Criteria weights sum to 1. At the sub-criterion level, criteria weights are shown as distributed to the sub-criteria under each criterion (e.g., the sub-criteria weights under a criterion sum to the criterion weight). Lowest level criteria evaluate the attributes of the alternatives. The priority score for an alternative (a management unit) is calculated as the sum of products of the lowest level criterion weights and the utility scores of each attribute for the alternative (note that Biodiversity and Soil Erosion are also a lowest level criteria). As implemented in EMDS, the single alternative is simply a placeholder that is replaced at runtime by the list of management units contained in the analysis area.
