# Supplementary material for: A Participatory and Spatial Multicriteria Decision Approach to Prioritize the Allocation of Ecosystem Services to Management Units
Source: MDPI journal article supplement (doi:10.3390/land10070747), 2021-07-16
Supplement: s1 [file s1]

Archive with 5 entries (5 files):
- land-1278682_SupplementS1_reviewed.pdf
- land-1278682_SupplementS2_reviewed.pdf
- land-1278682_SupplementS3_reviewed.pdf
- land-1278682_SupplementS4_reviewed.pdf
- land-1278682_SupplementS5_reviewed.pdf
