# Supplementary material for: A Participatory and Spatial Multicriteria Decision Approach to Prioritize the Allocation of Ecosystem Services to Management Units
Source: MDPI journal article supplement (doi:10.3390/land10070747), 2021-07-16
Supplement: s1 [file s1 › land-1278682_SupplementS2_reviewed.pdf]

**Supplement S2**

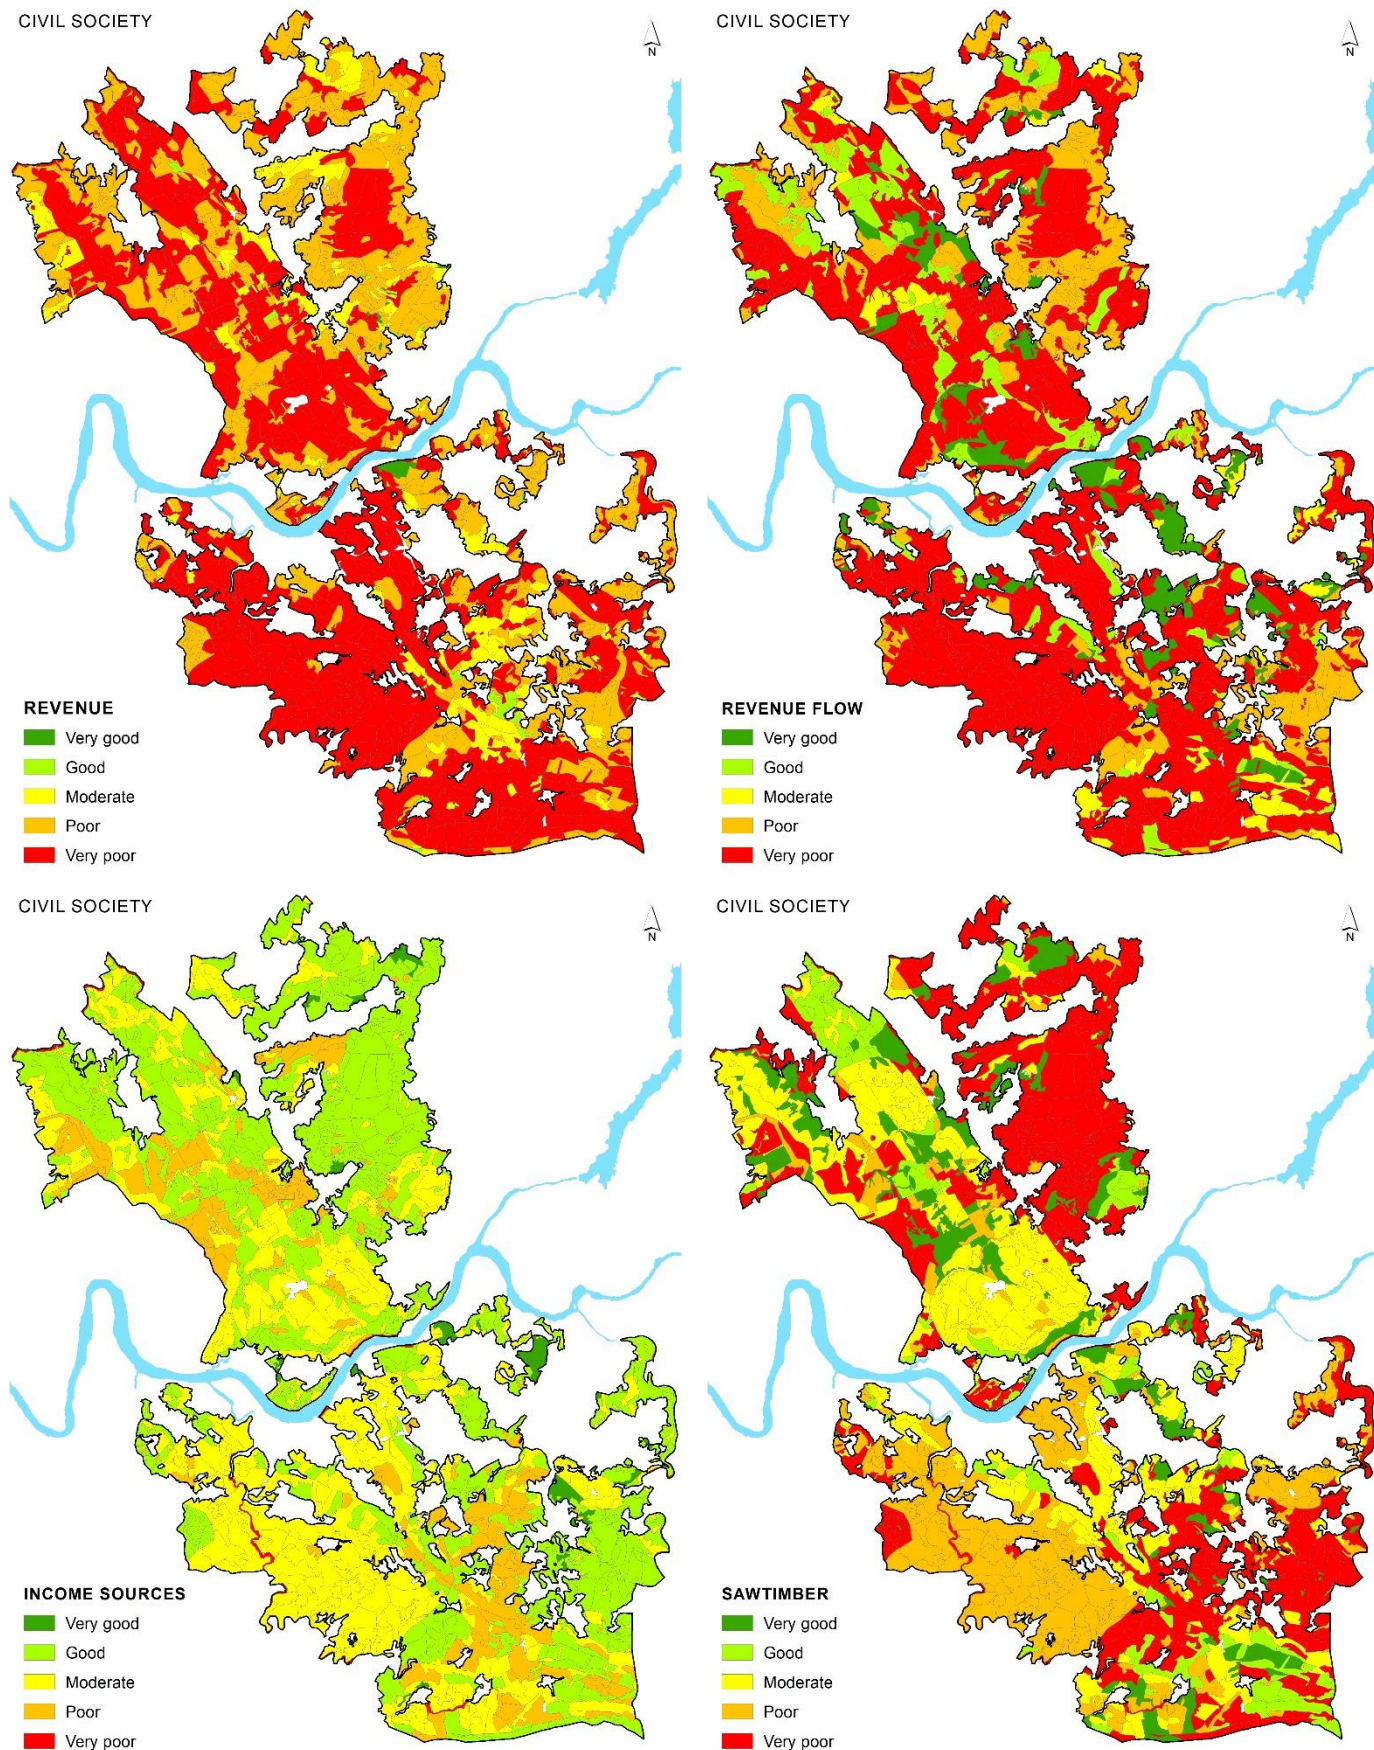

**Figure S2.1. Cont.**

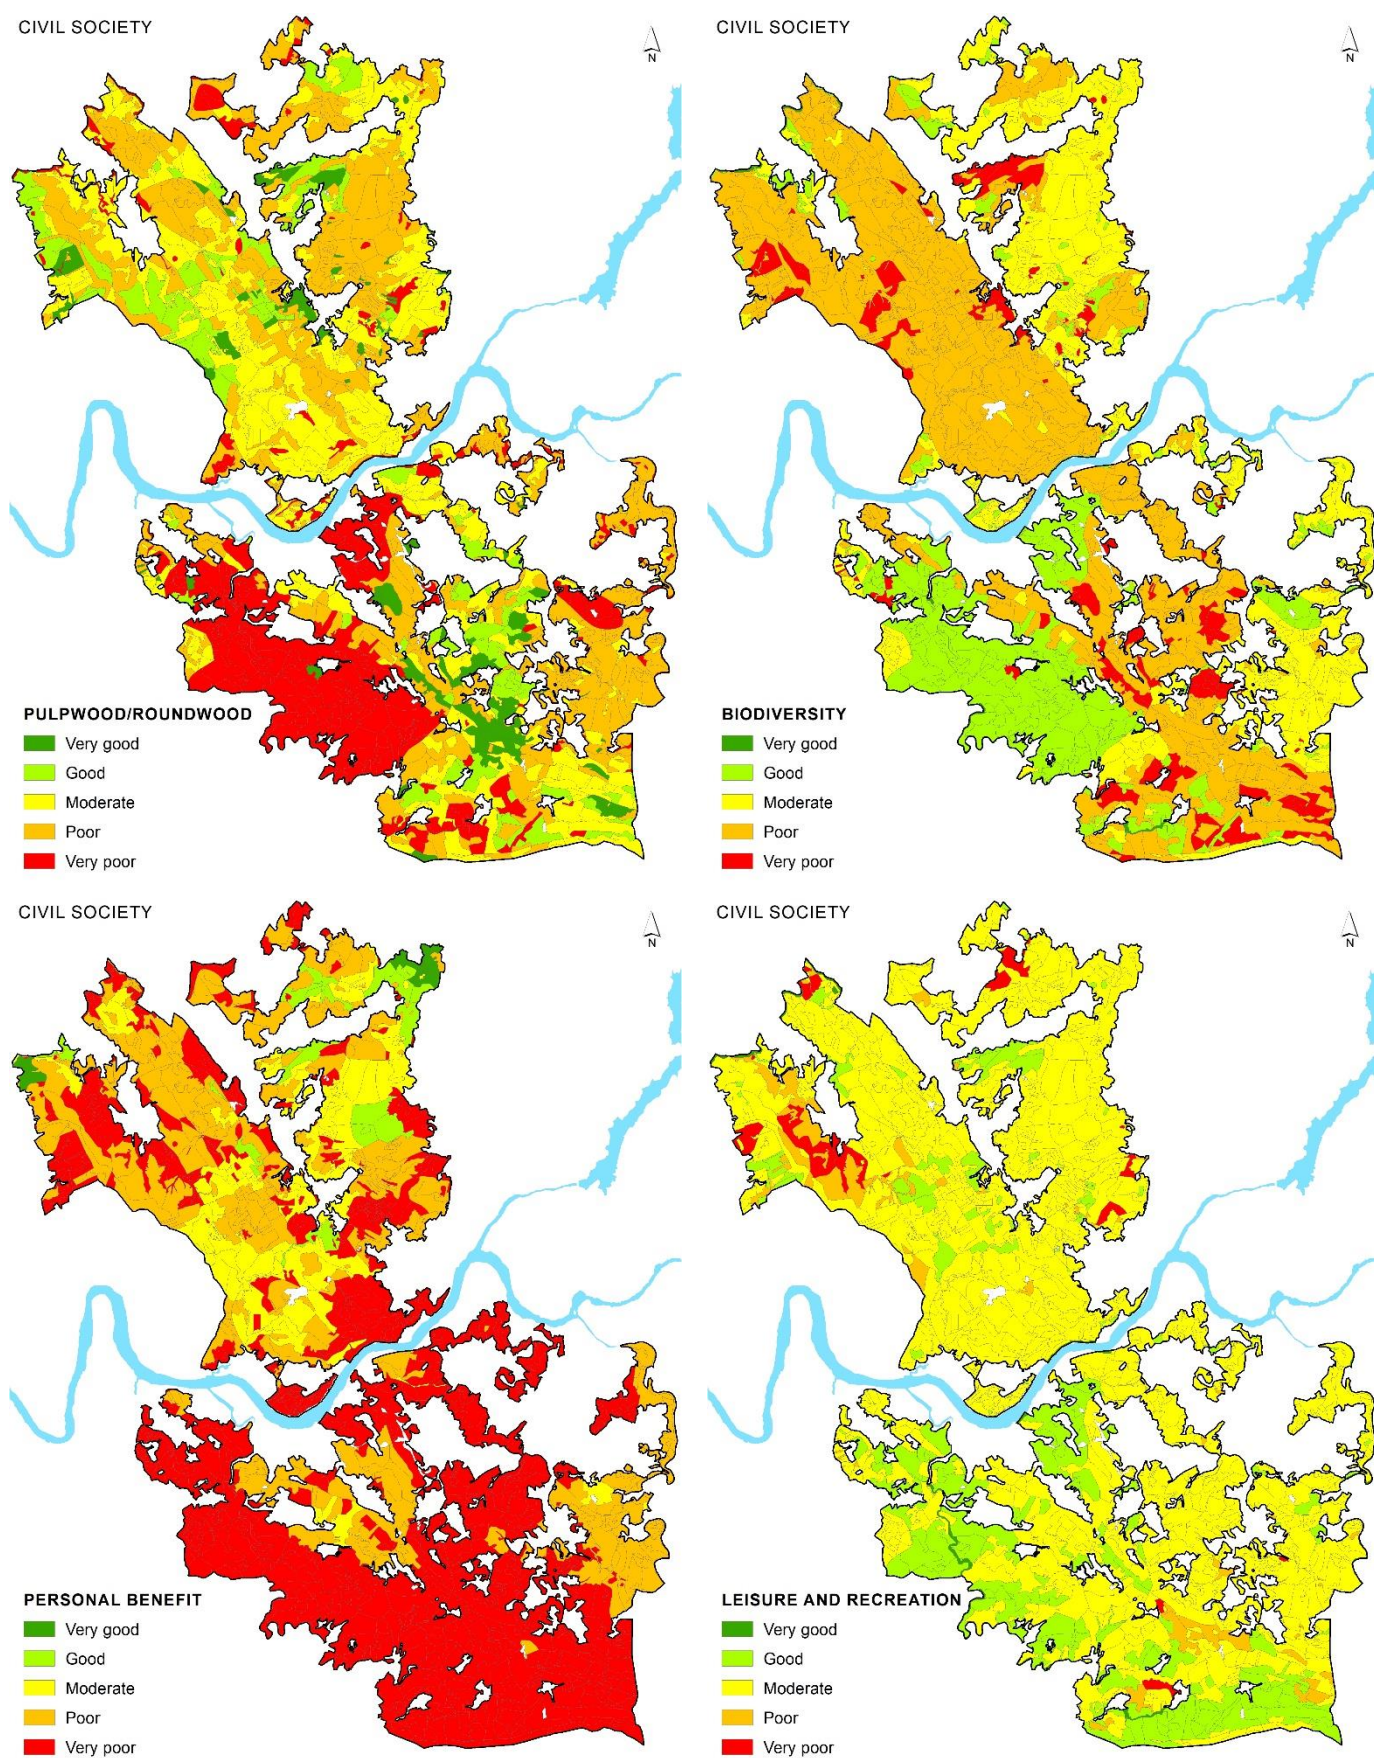

Figure S2.1. Cont.

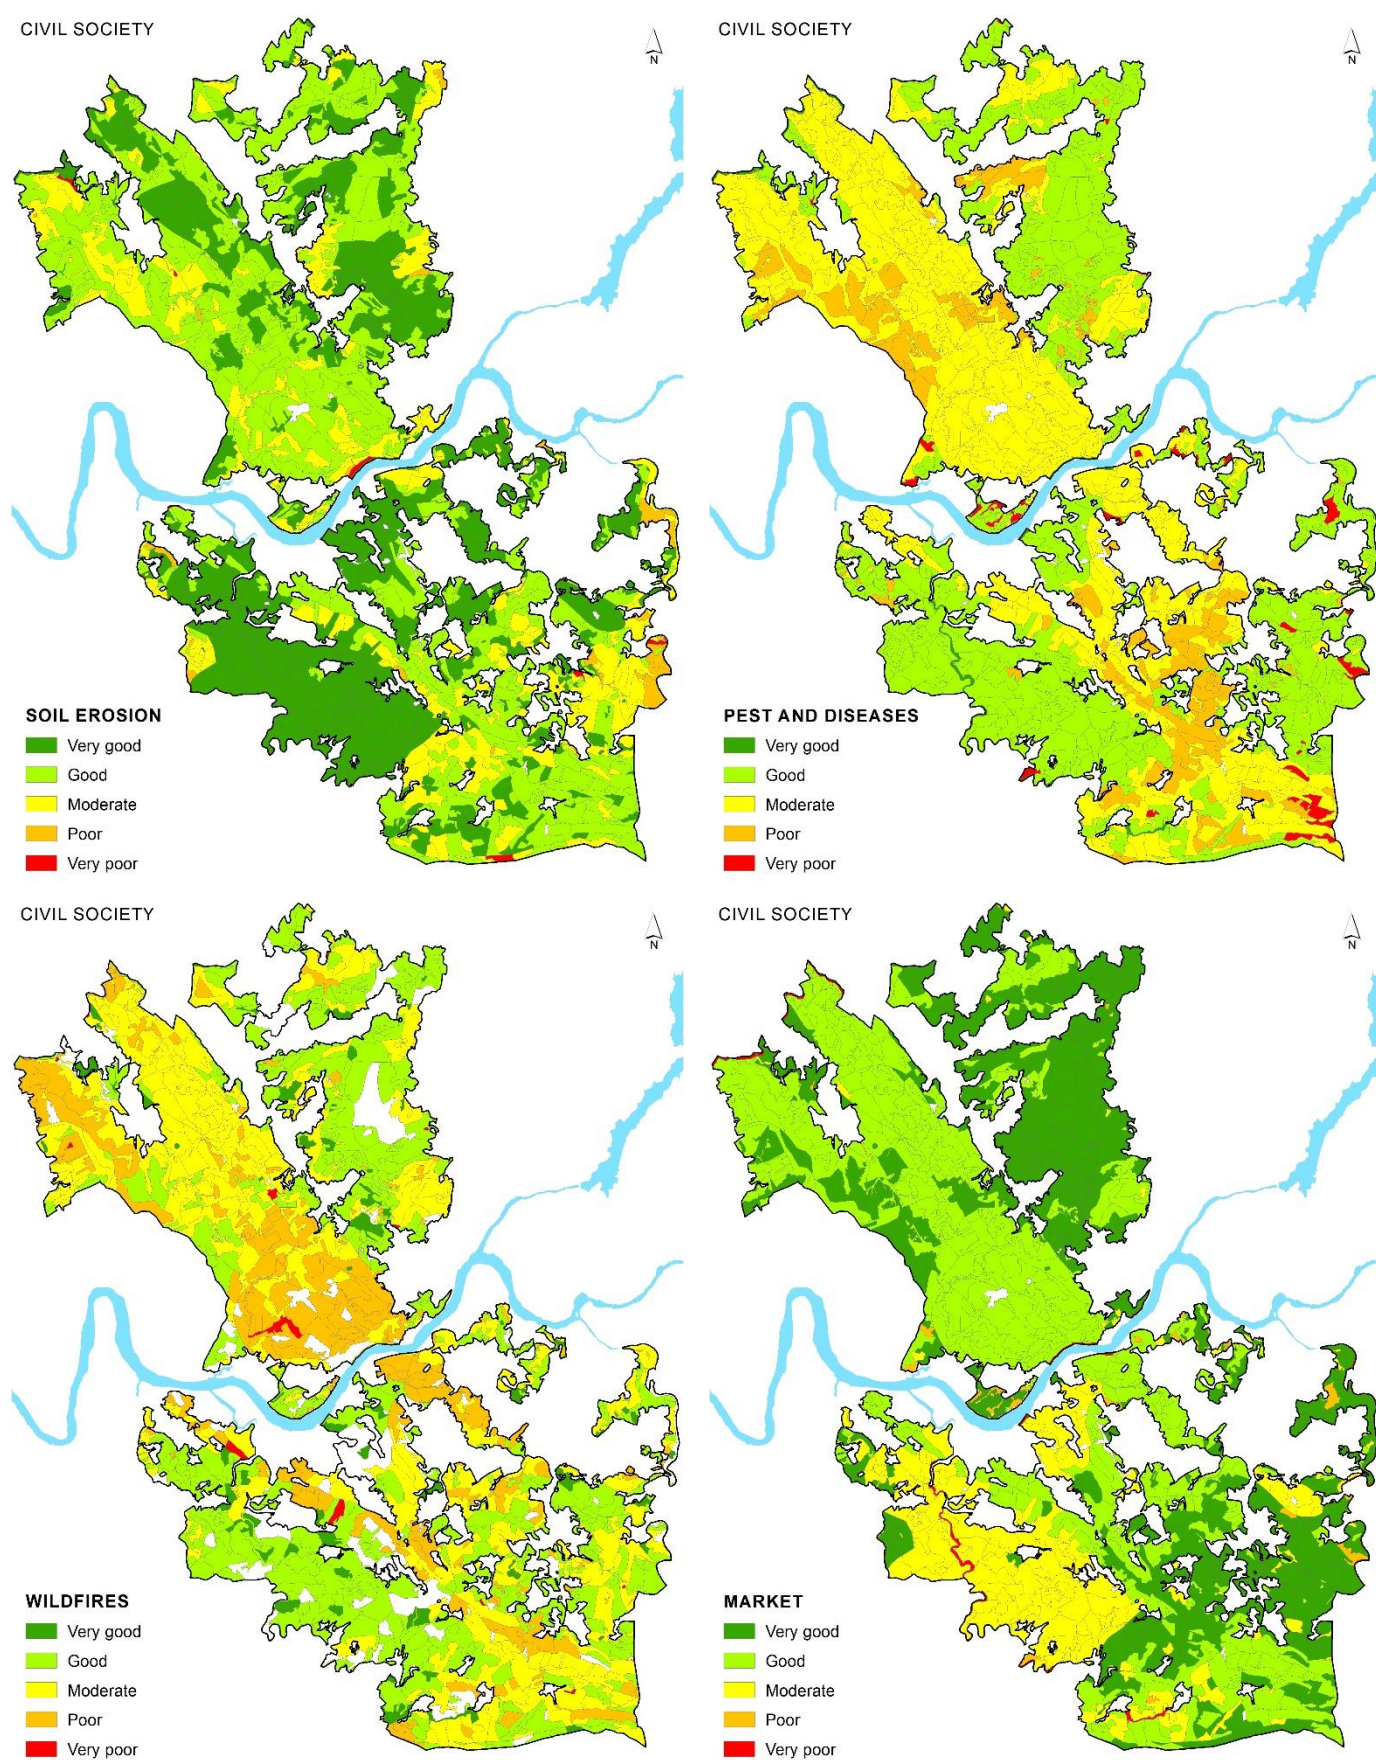

Figure S2.1. Data normalized from the Pareto frontier solution for the civil society group.

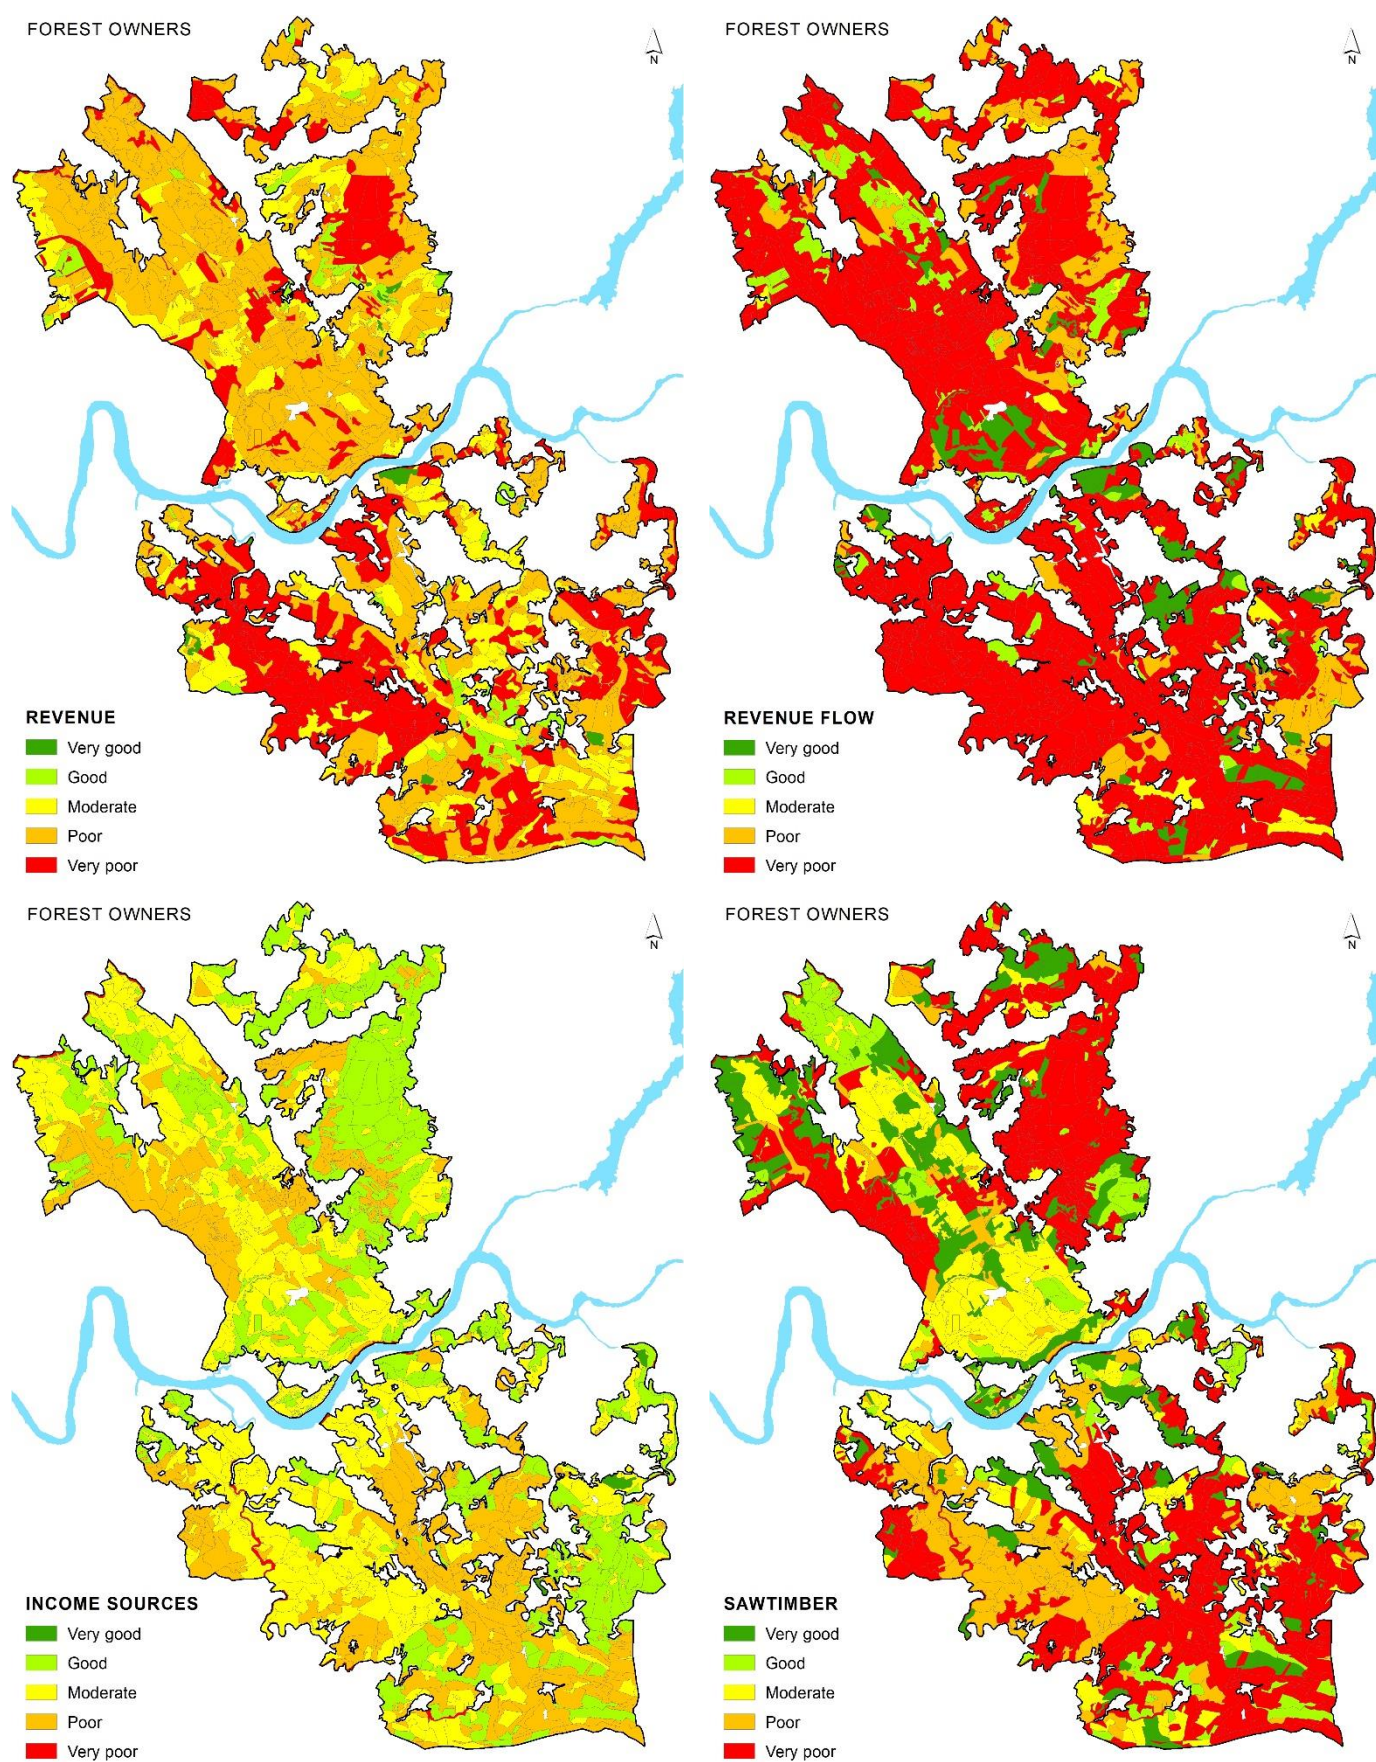

Figure S2.2. Cont.

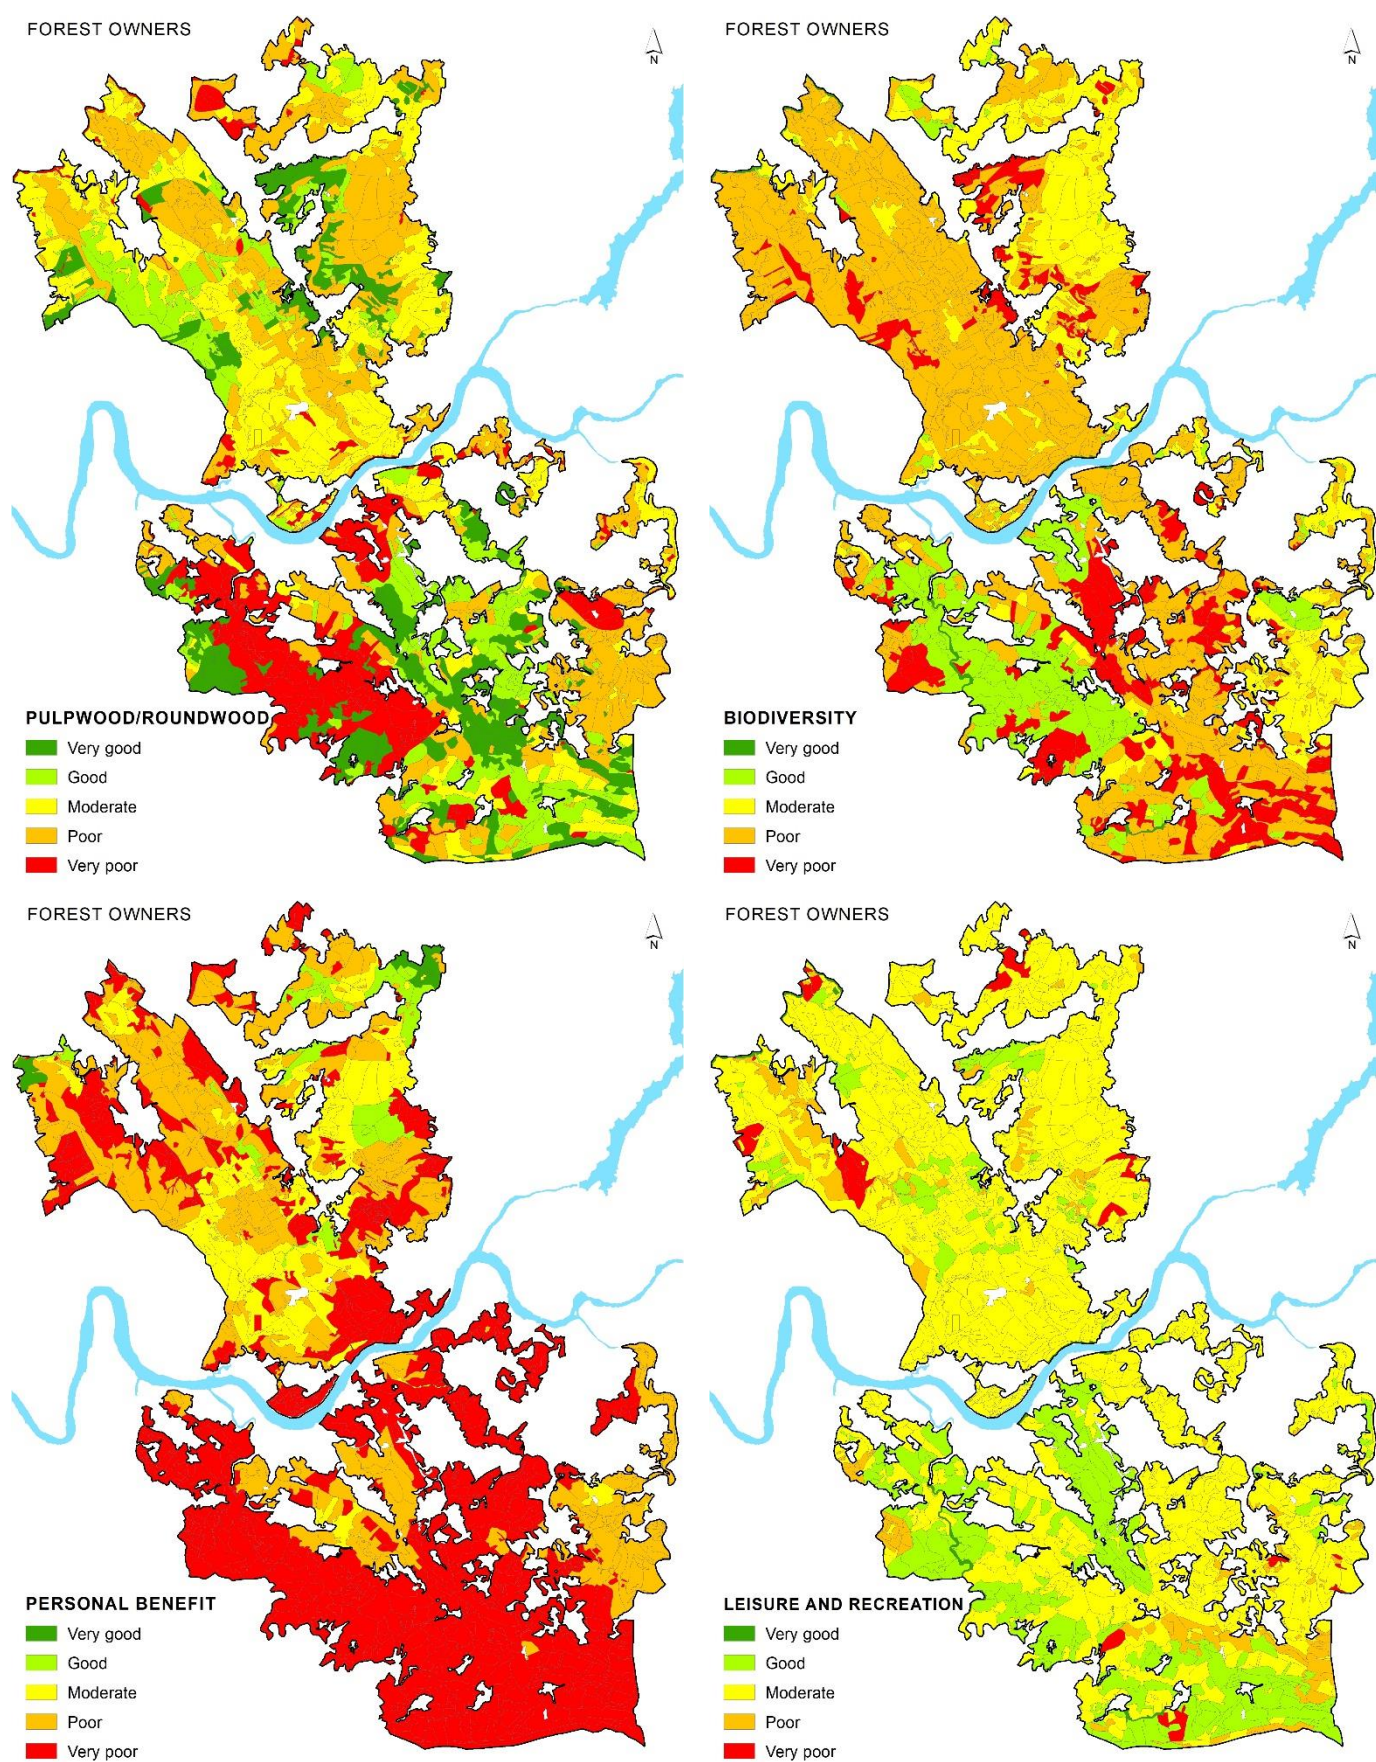

Figure S2.2. Cont.

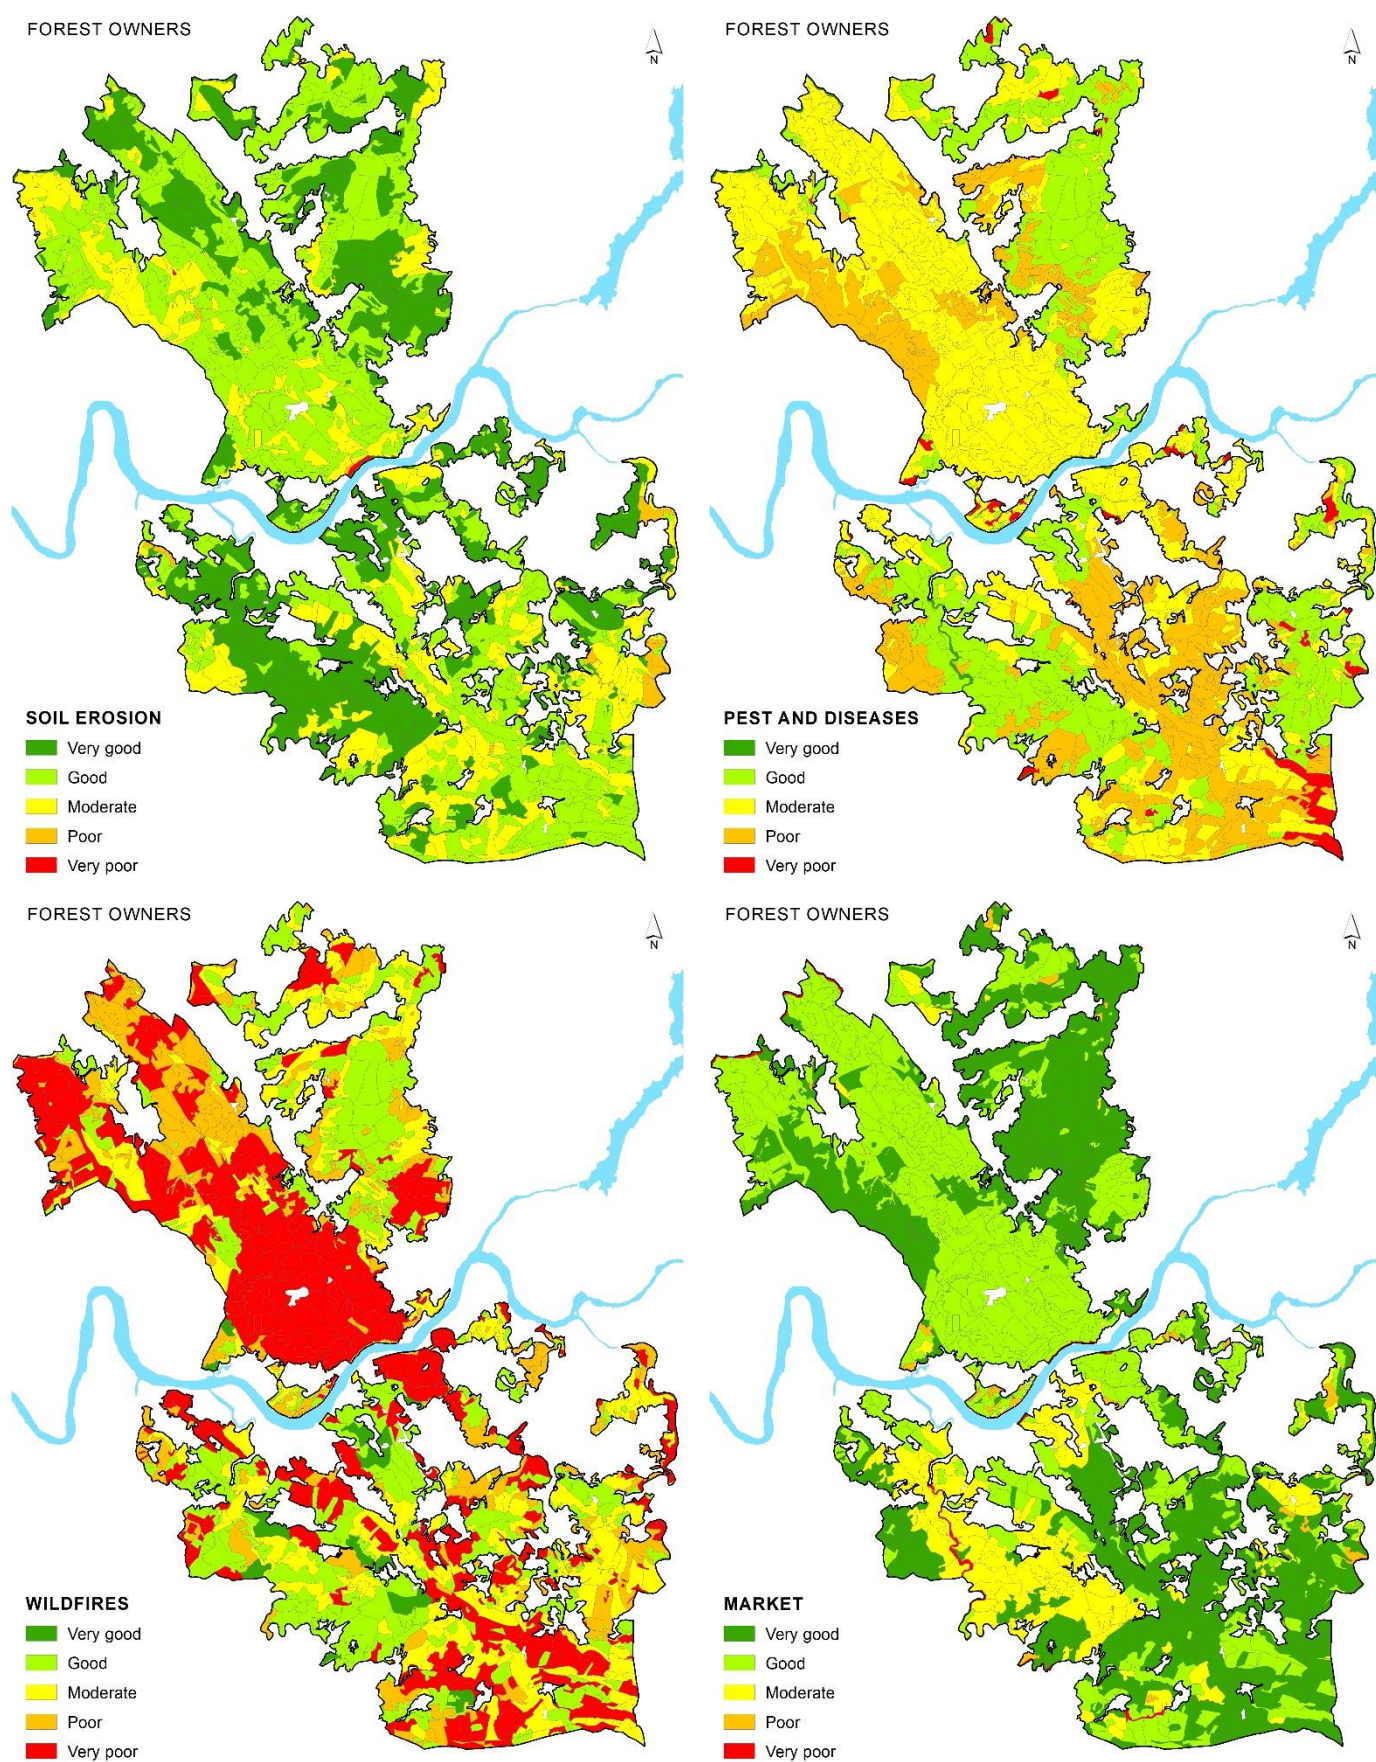

**Figure S2.2.** Data normalized from the Pareto frontier solution for the forest owners' group.

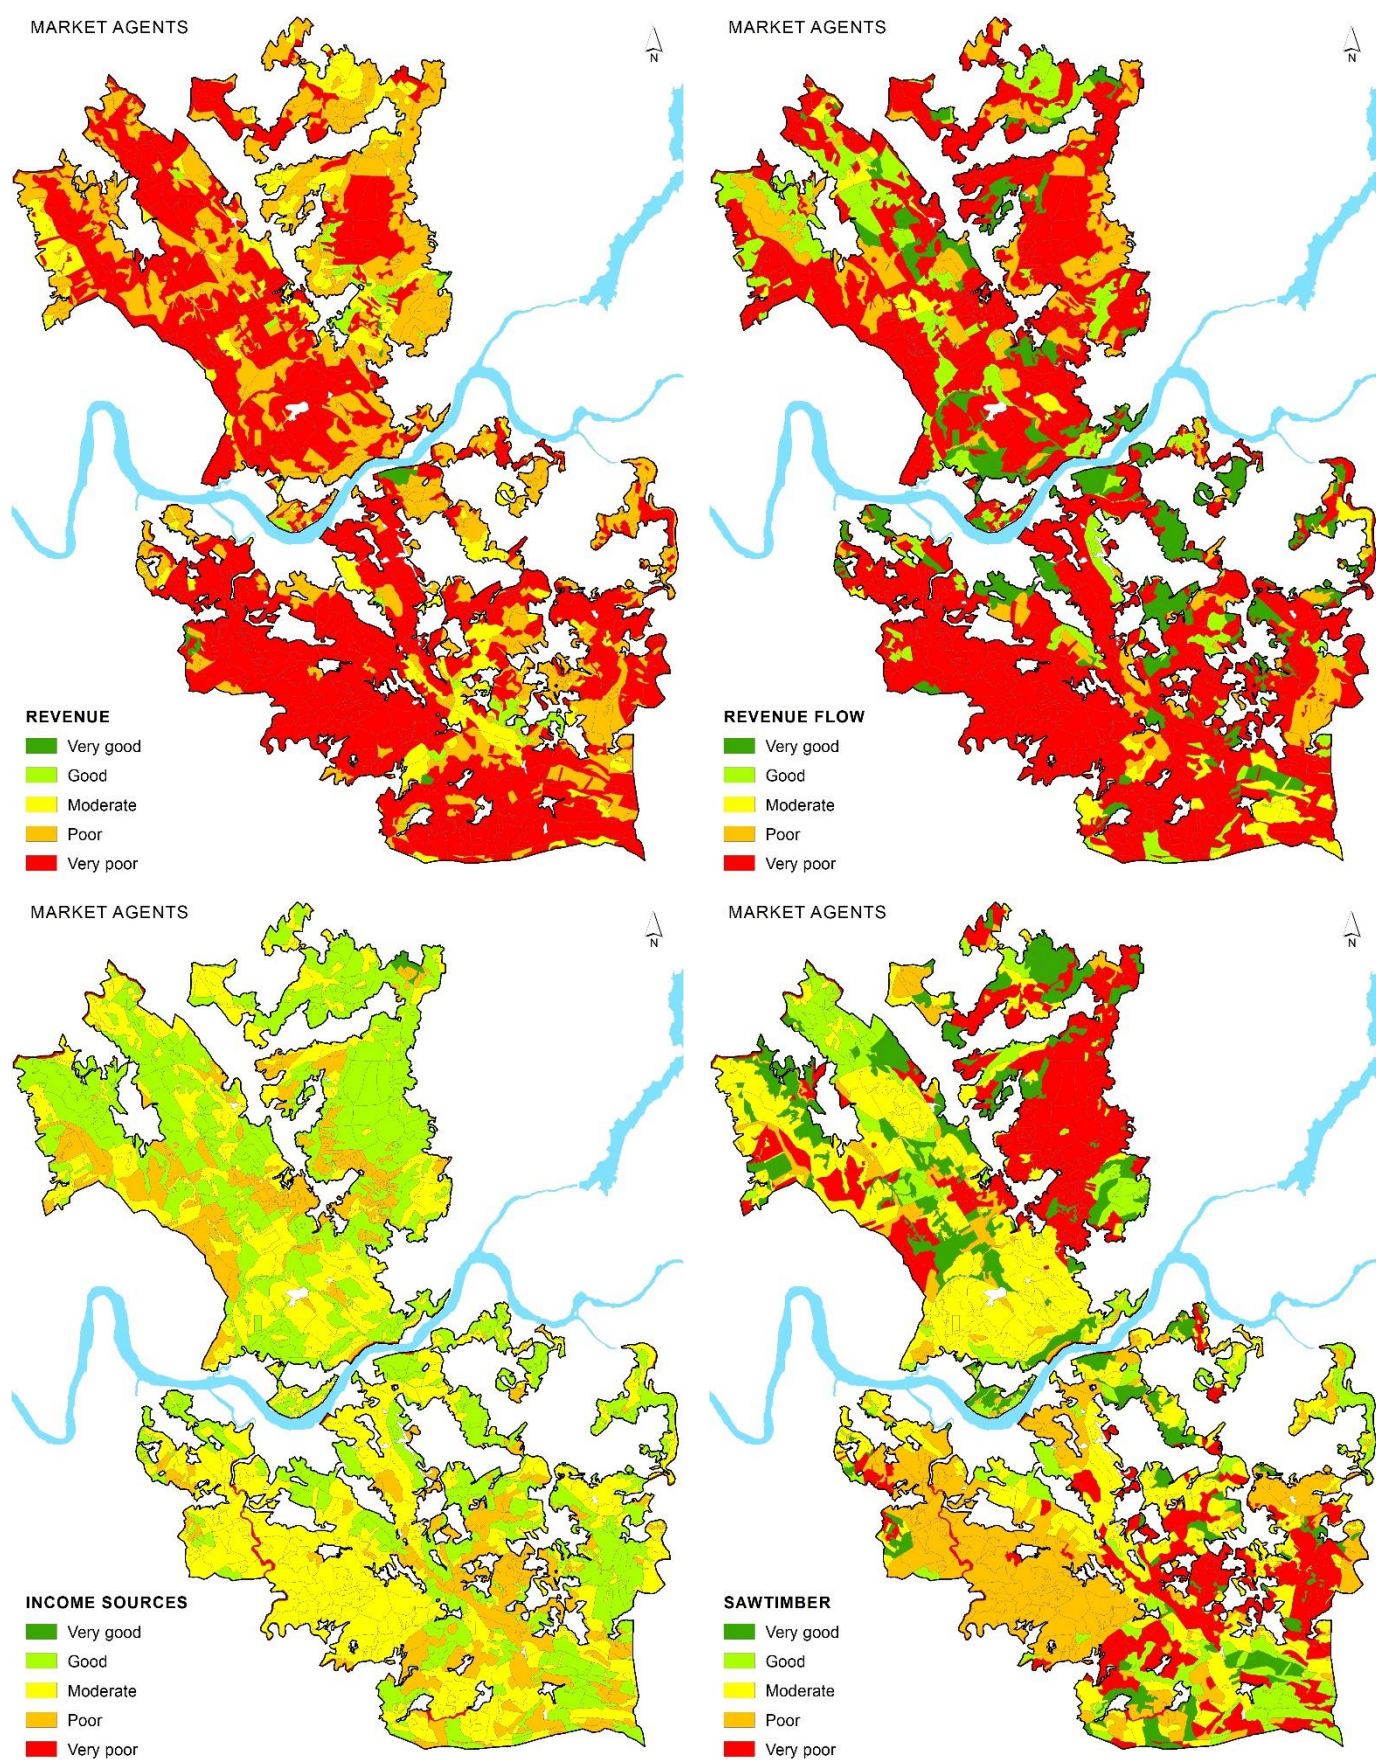

Figure S2.3. Cont.

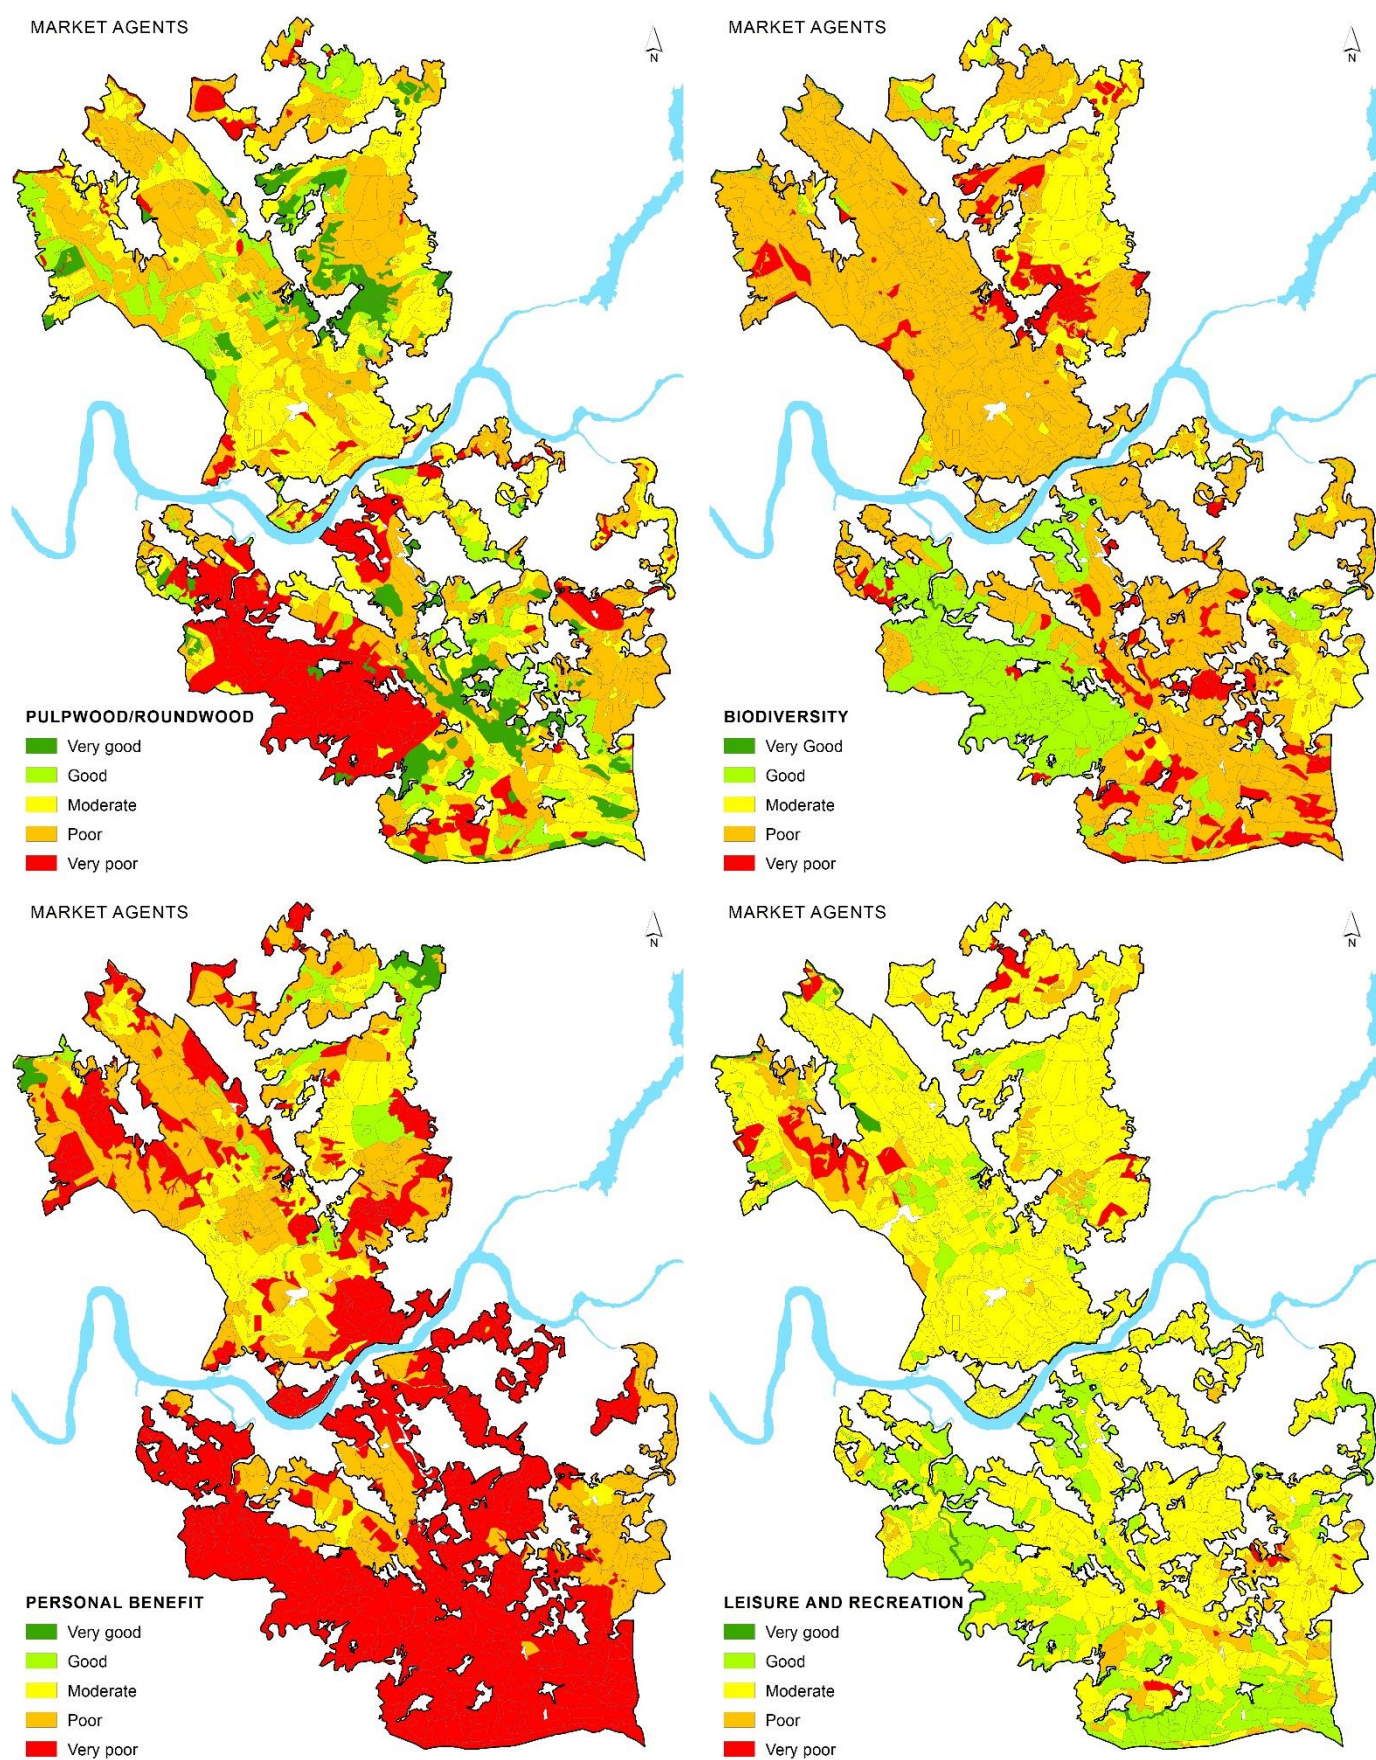

Figure S2.3. Cont.

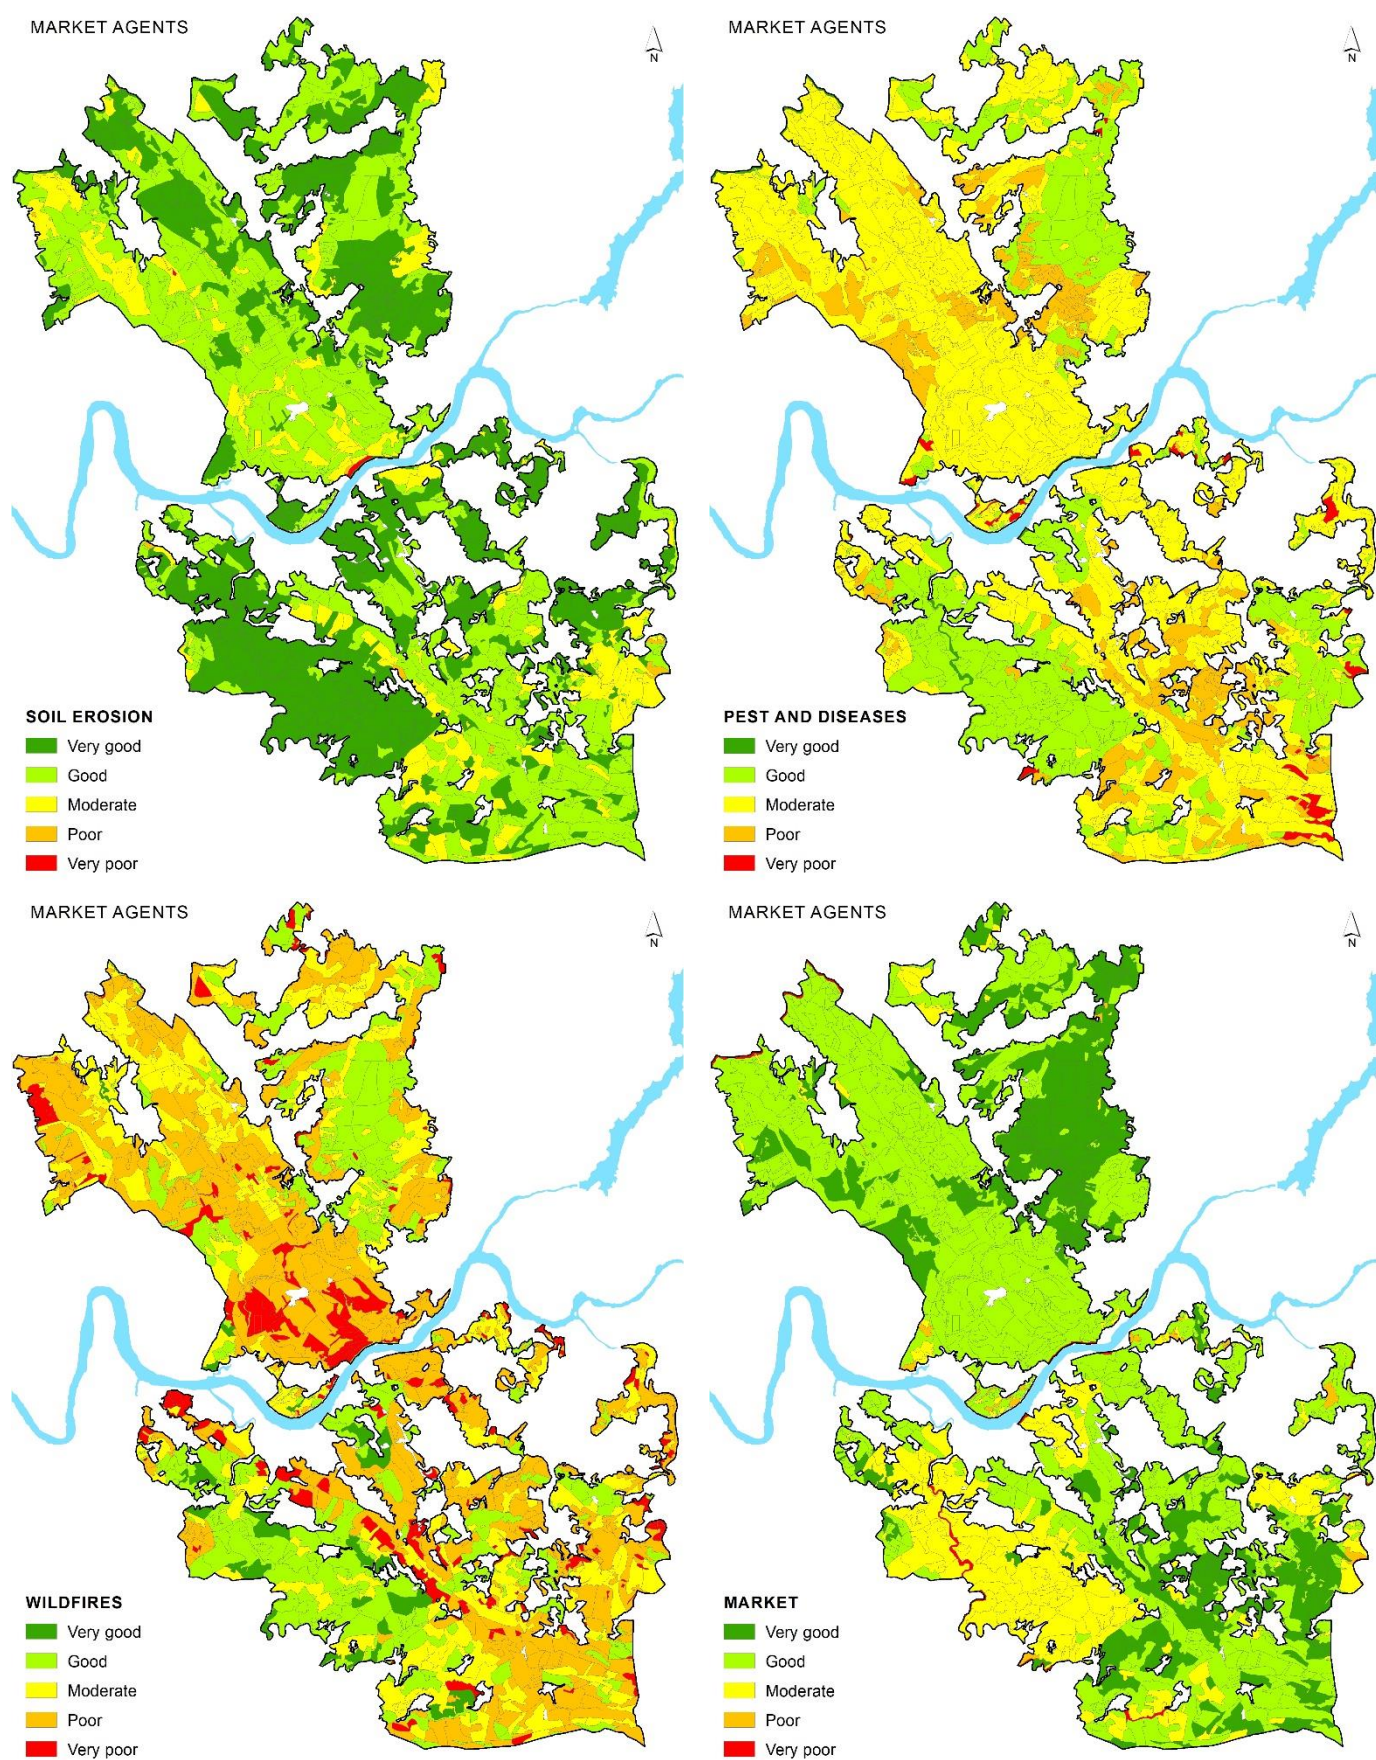

Figure S2.3. Data normalized from the Pareto frontier solution for the market agents' group.

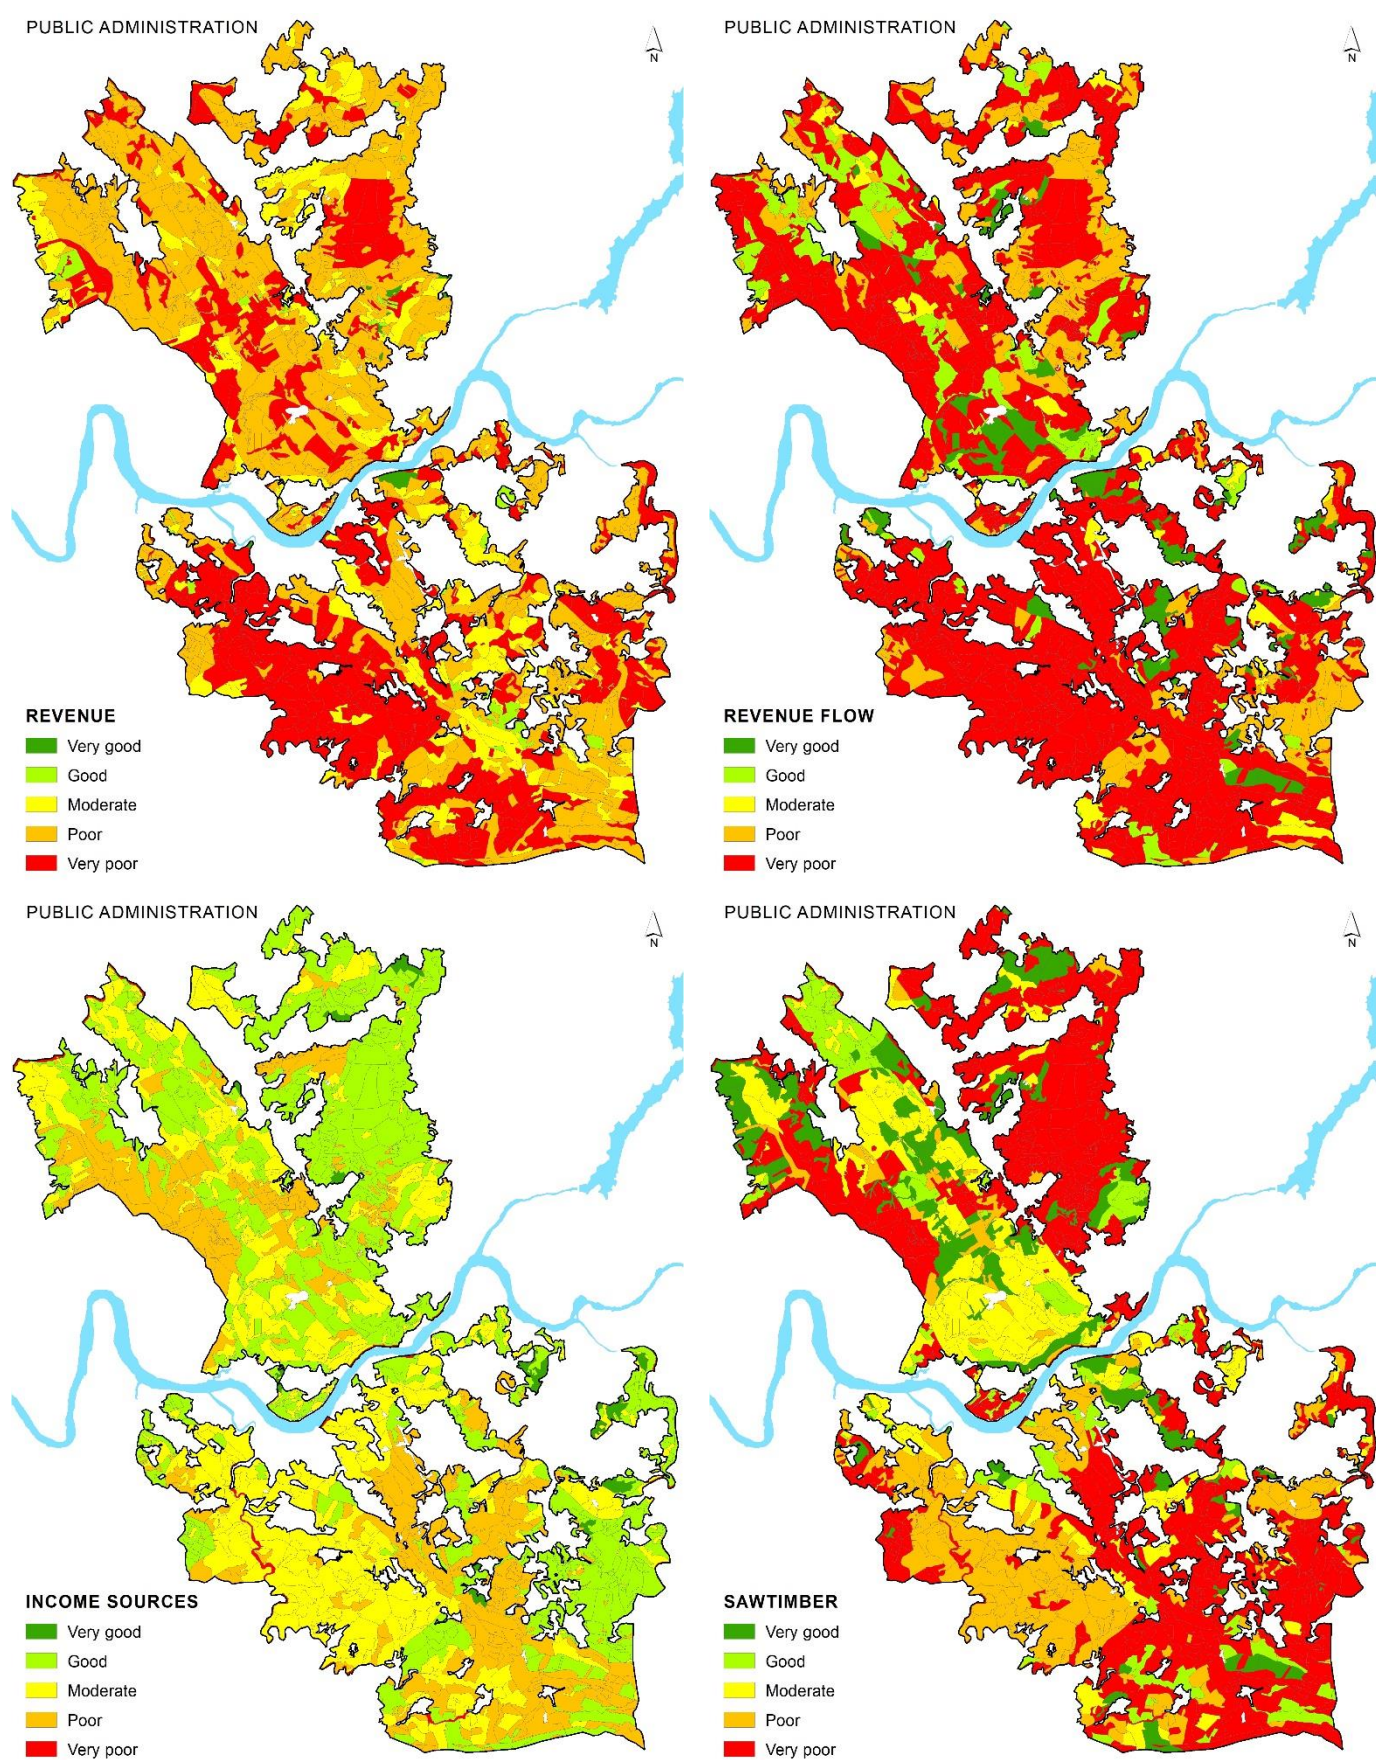

Figure S2.4. Cont.

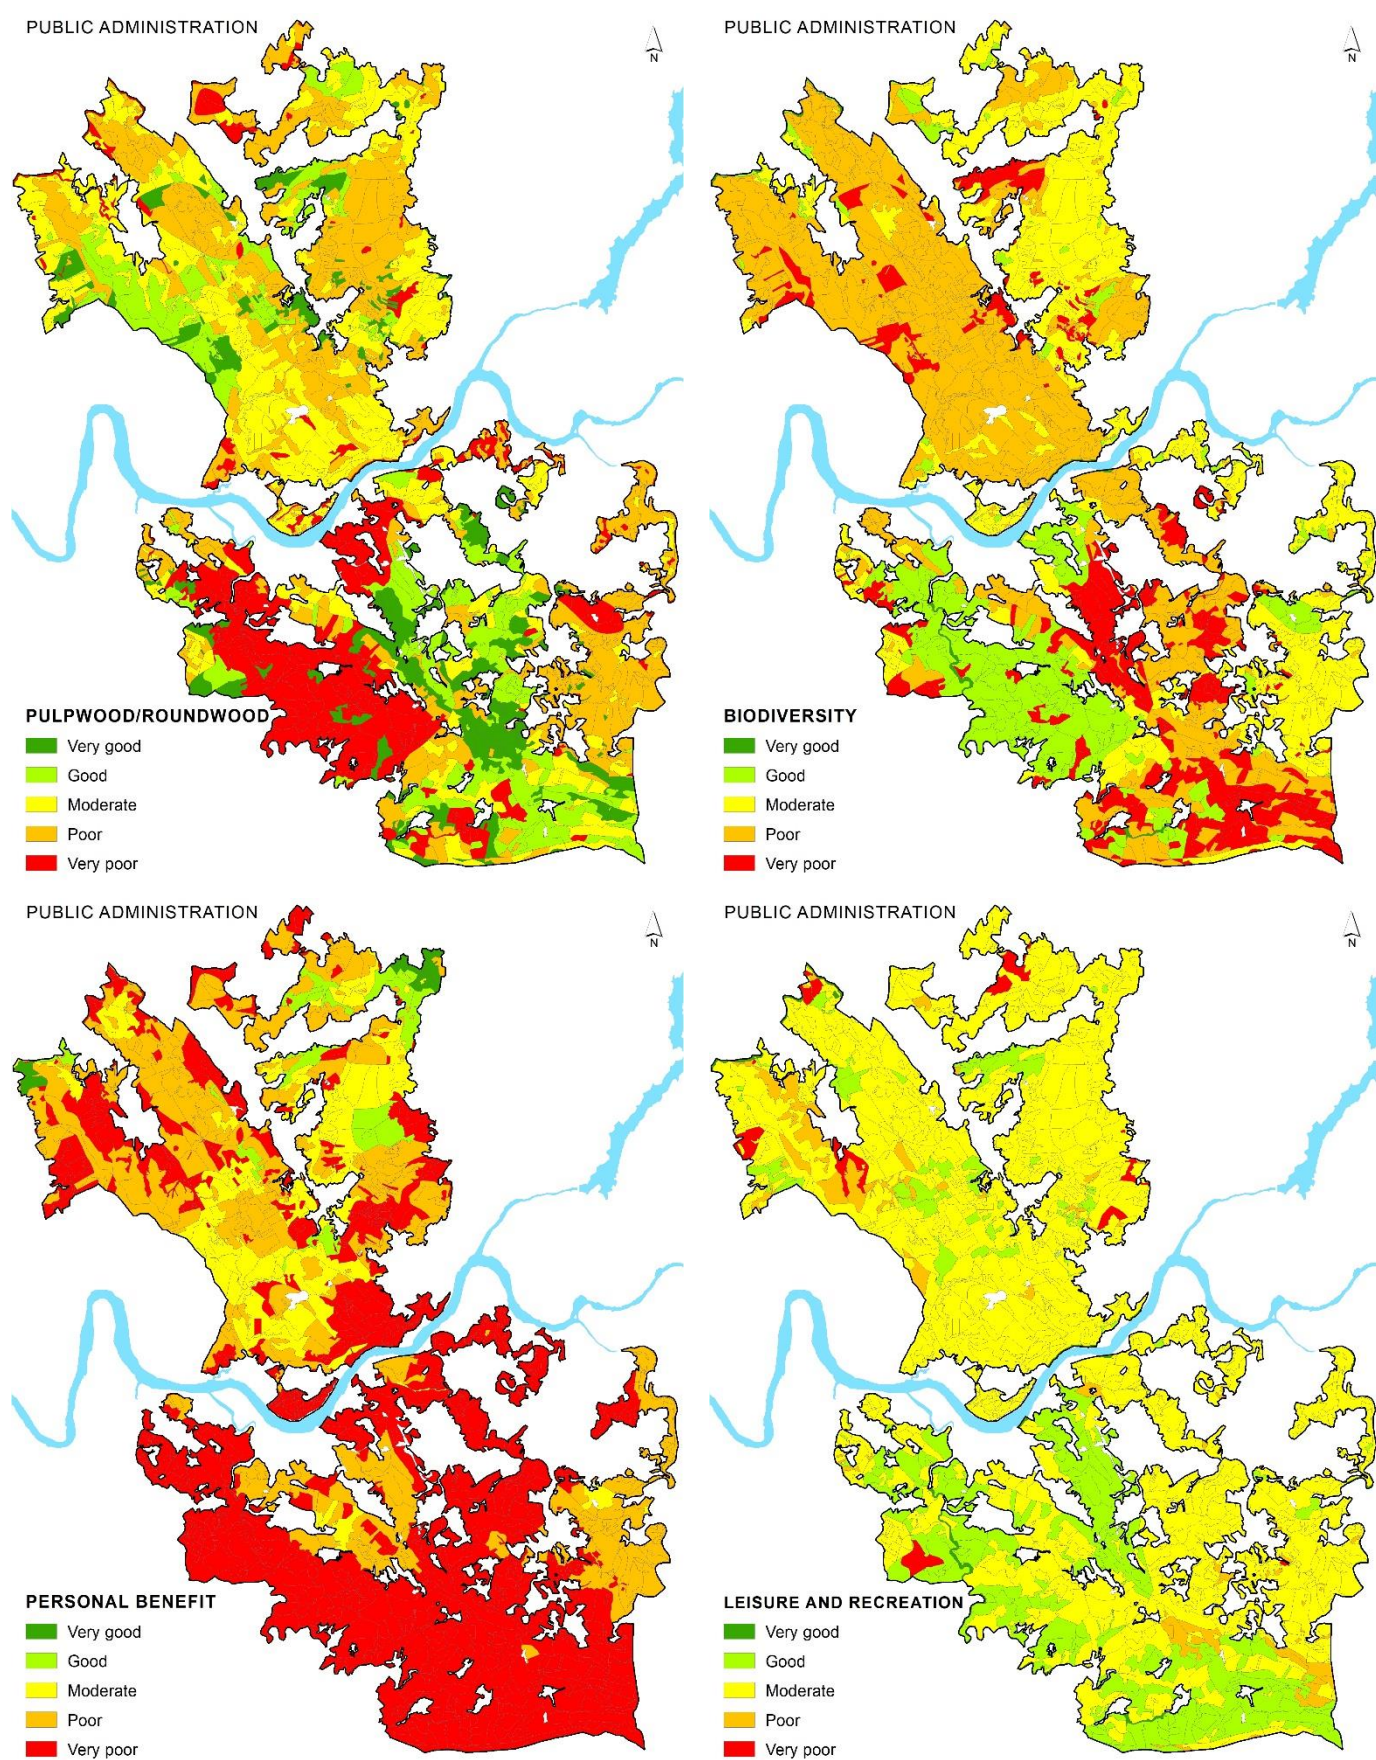

Figure S2.4. Cont.

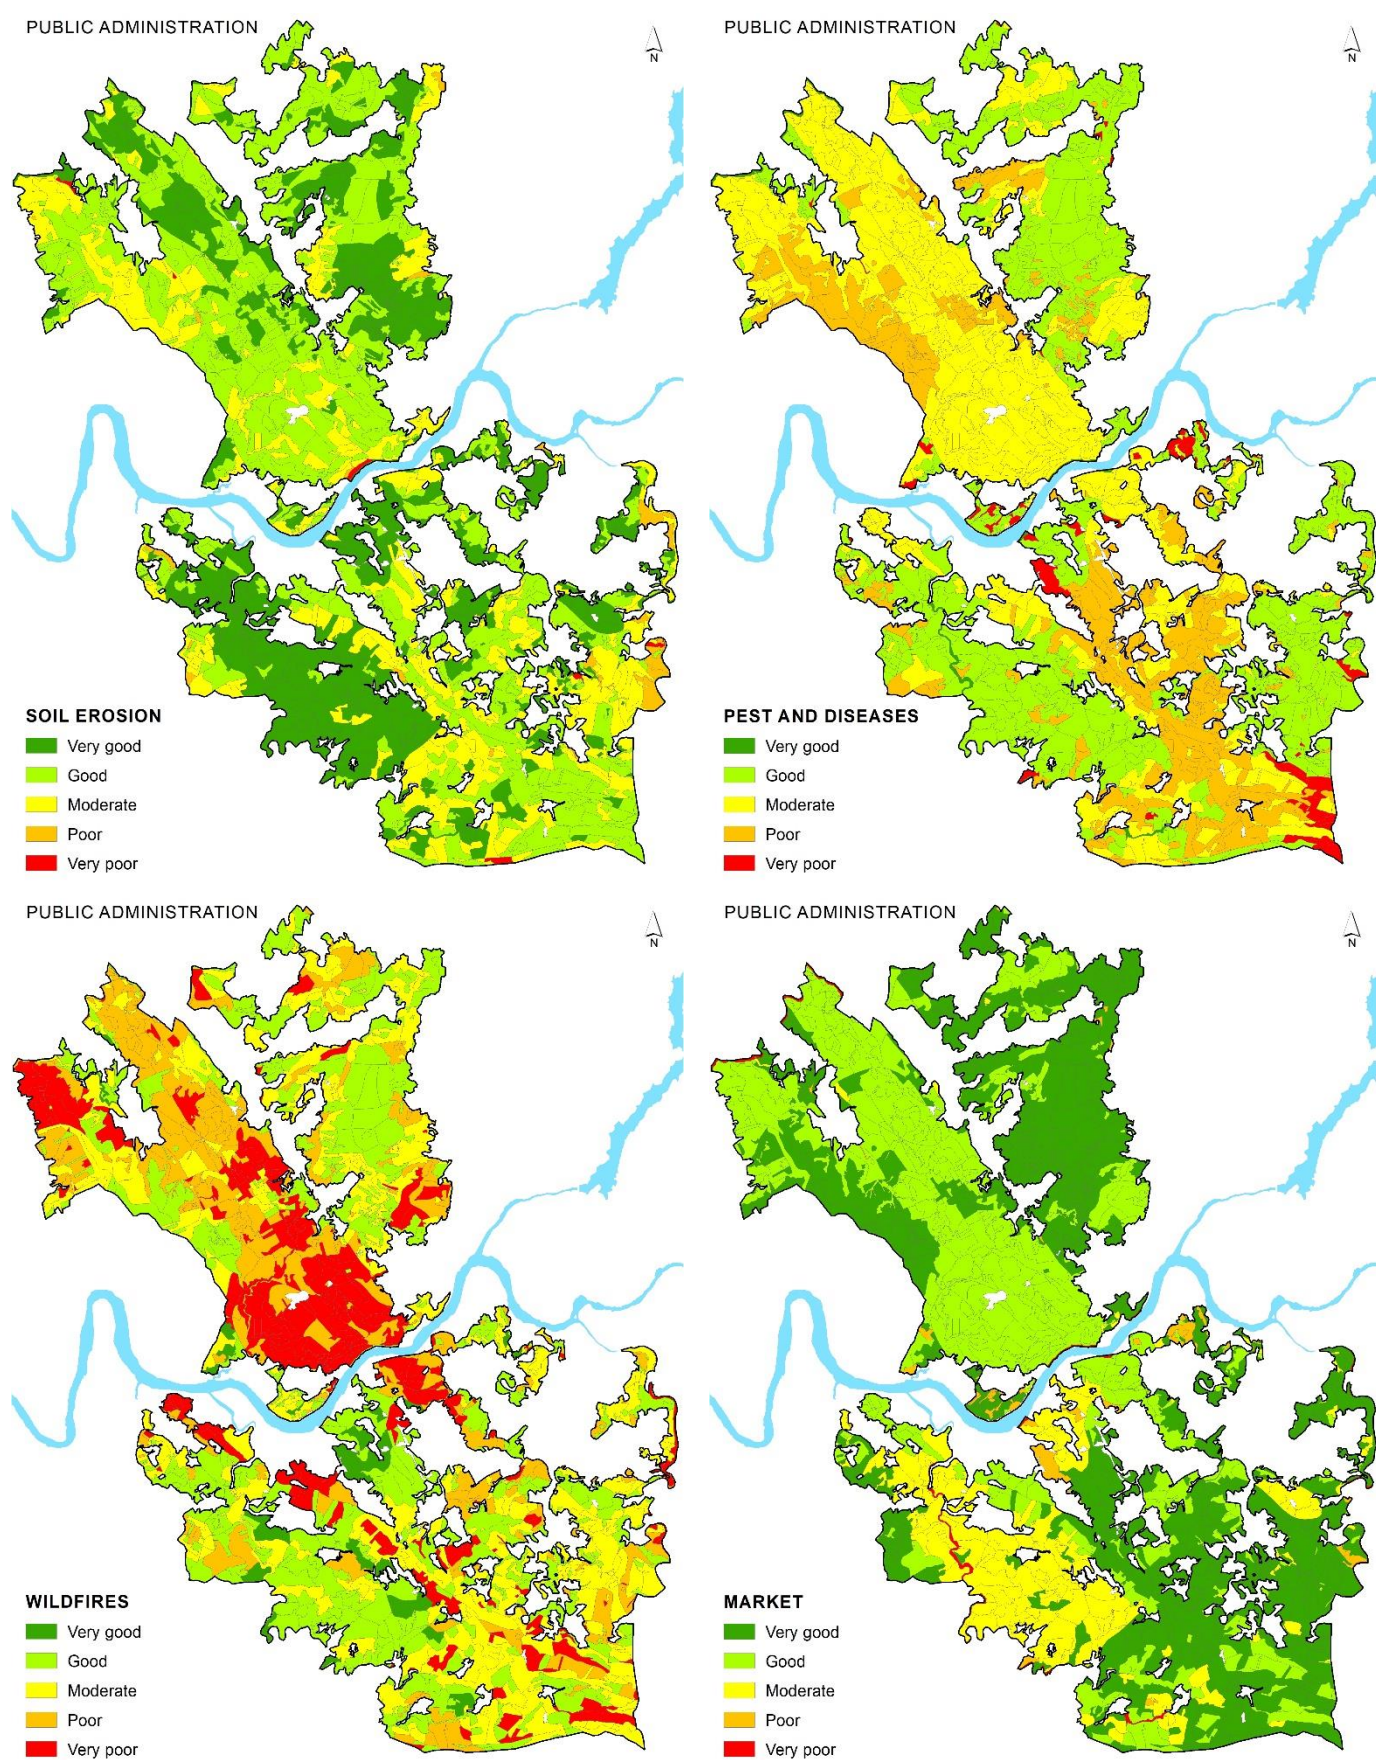

Figure S2.4. Data normalized from the Pareto frontier solution for the public administration group.
